# Supplementary material for: Odorant and Gustatory Receptors in the Tsetse Fly Glossina morsitans morsitans
Source: PubMed Central journal article supplement (PMC3998910; doi:10.1371/journal.pntd.0002663), 2014-04-24

**Figure S1: The genomic structure of *Glossina morsitans morsitans* Chemoreceptor OR and GR genes.** The horizontal bold type line represent the scaffold sequence, with numerical sequences indices; yellow bars are the coding exons for each gene locus; gene names annotated are indicated at the 5' ends of the genes

Scf-639717: gene loci with alternative splice variants

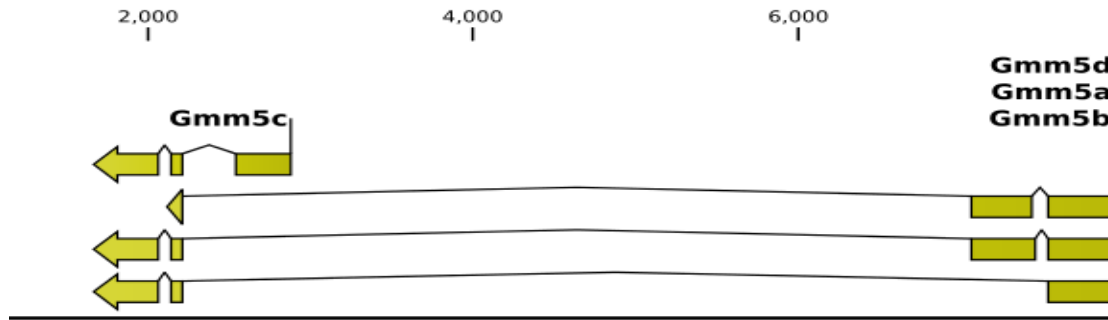

scf-648756

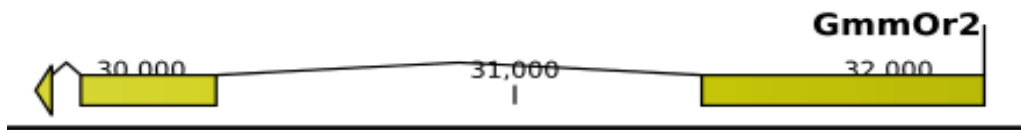

Scf-644232

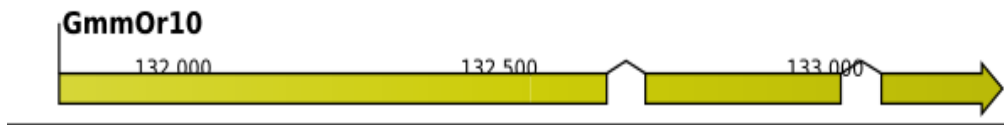

Scf-651846

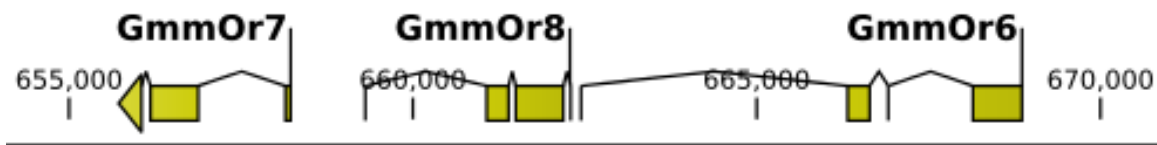

Scf-648410

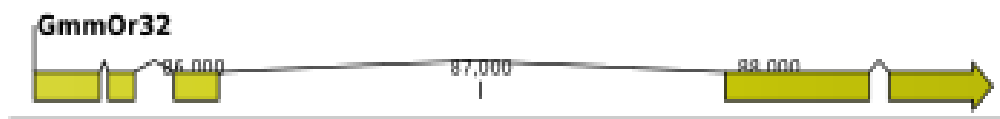

Scf-645812

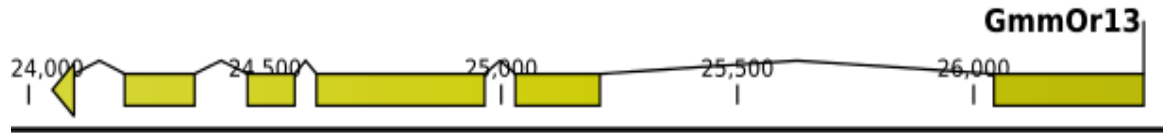

Scf-648495

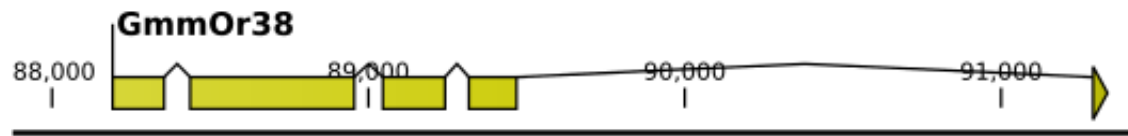

Scf-648373

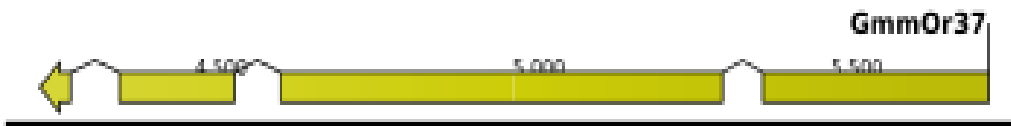

Scf-648373

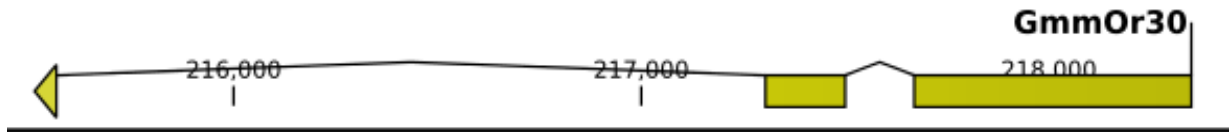

Scf-648080

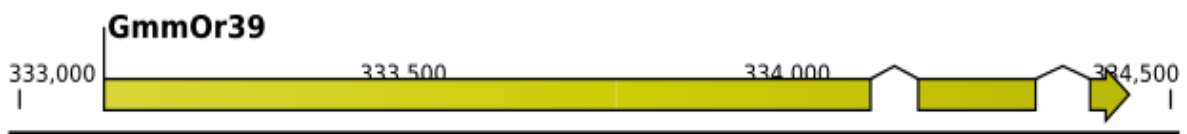

Scf-648614

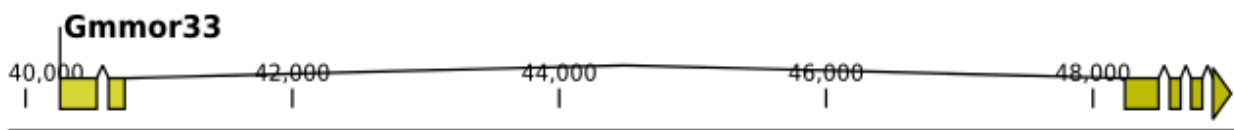

Scf-648722

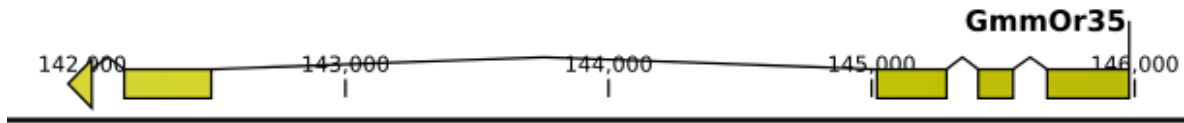

Scf-648722

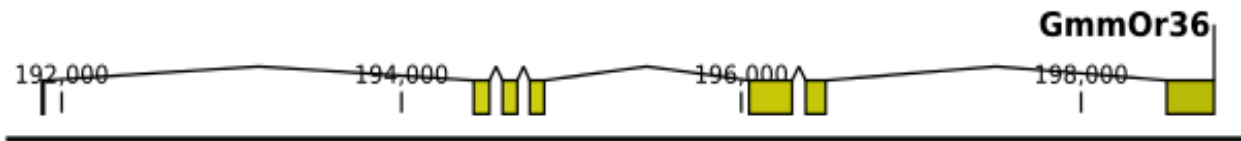

Scf-648792: gene loci in tandem

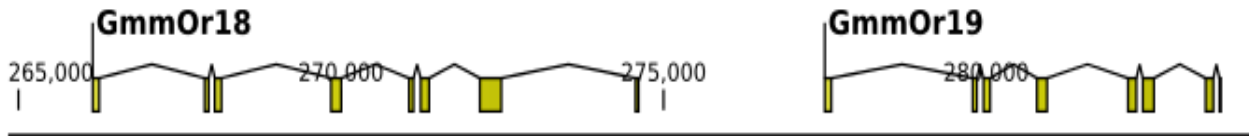

Scf-649009: gene loci in tandem

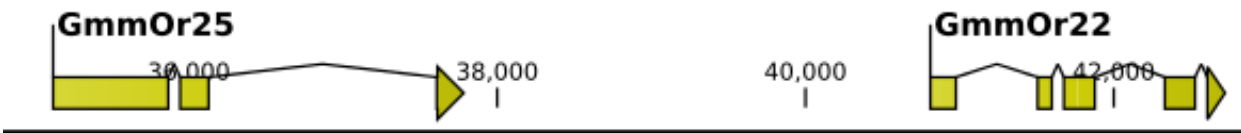

Scf-649095

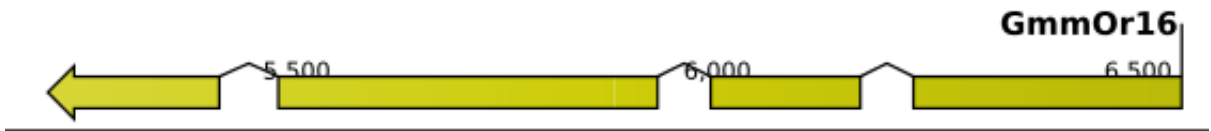

Scf-650238

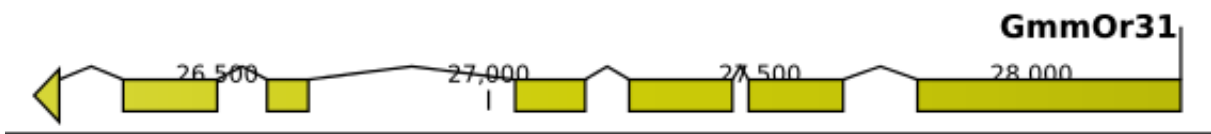

Scf-651490

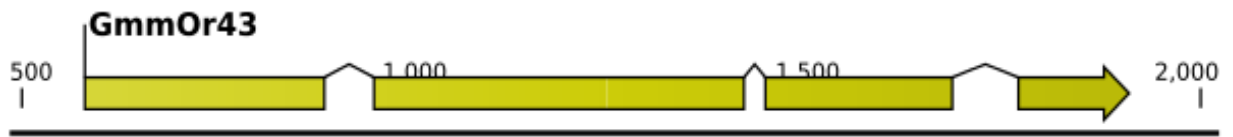

Scf-650866: gene in tandem; Or28 pseudo gene

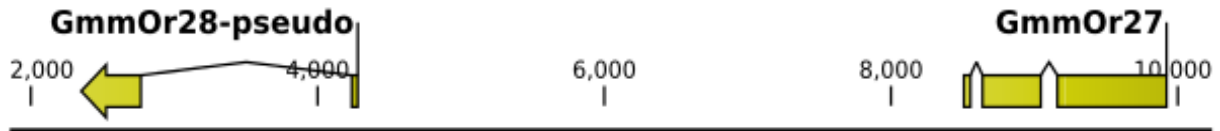

Scf-651831

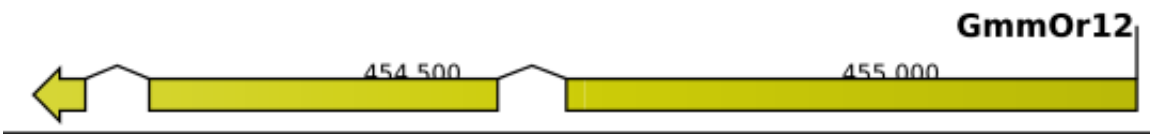

Scf-651027

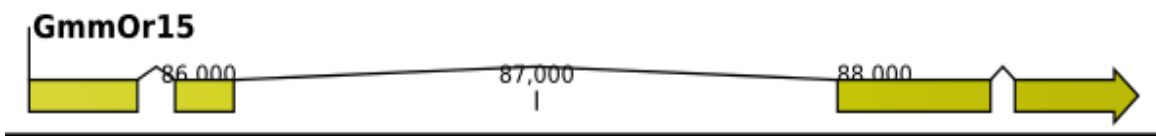

Scf-652141

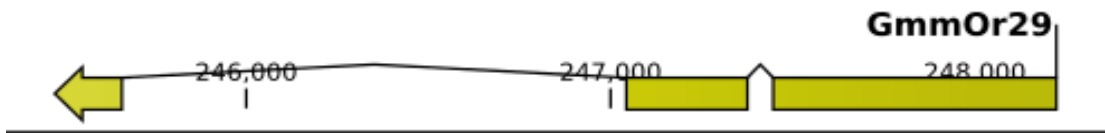

Scf-651846

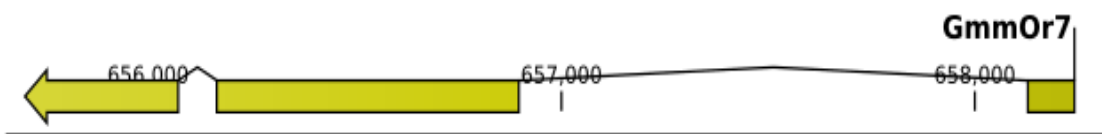

Scf-652156

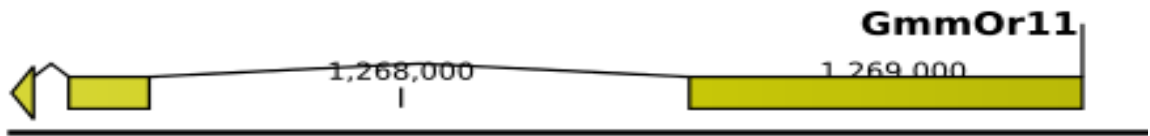

Scf-652157

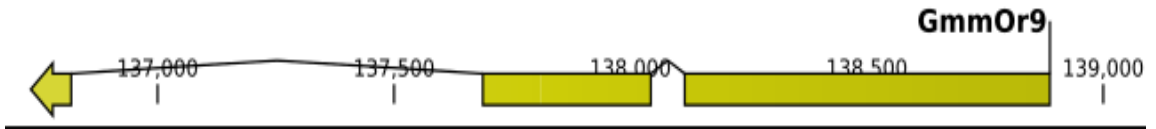

Scf-652170

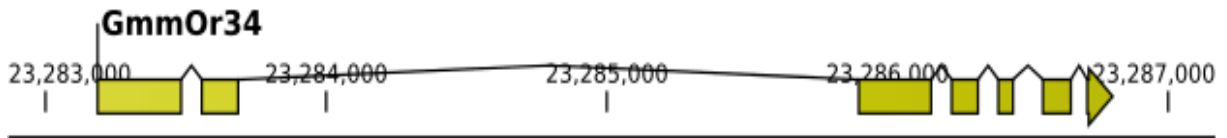

Scf-652157: GmmOr20 is a pseudo gene

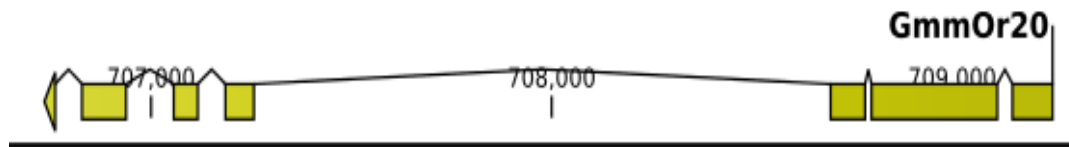

Scf-652170

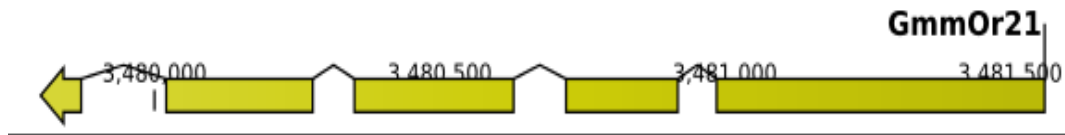

Scf-652170: GmmOr23 has only 2 THMM, likely pseudogenization

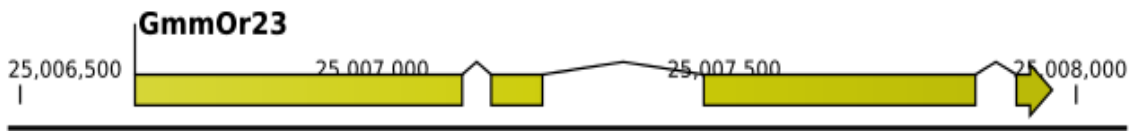

Scf-652157

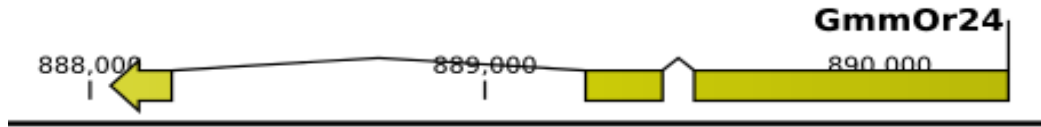

Scf-649048: genes in tandem

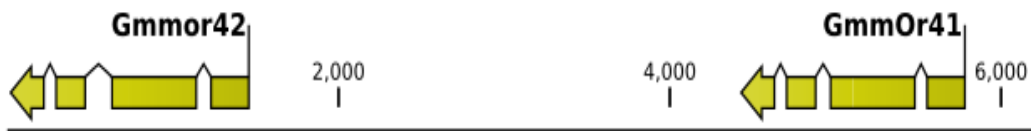

Scf-652170

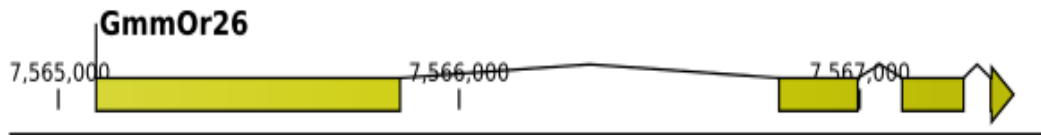

Scf-650866: pseudogene

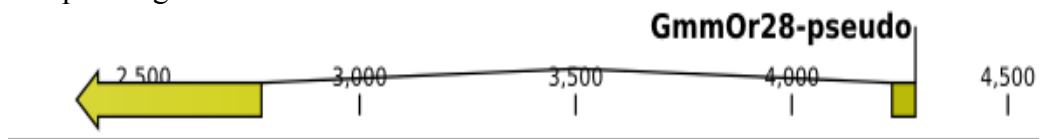

Scf-648928

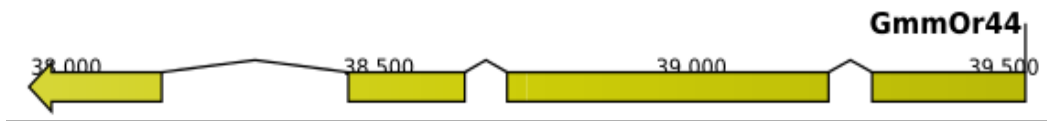

Scf-650705

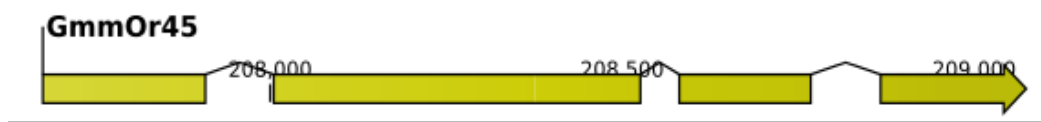

Supplement: pntd.0002663.s002.pdf [file pntd.0002663.s002.pdf]
