# Supplementary material for: Odorant and Gustatory Receptors in the Tsetse Fly Glossina morsitans morsitans
Source: PubMed Central journal article supplement (PMC3998910; doi:10.1371/journal.pntd.0002663), 2014-04-24
Supplement: pntd.0002663.s001.pdf [file pntd.0002663.s001.pdf]

Supplementary material

Dataset S1. Annotated amino acid sequences of *Glossina morsitans morsitans* ORs and GRs.

>GmmOR1|Orco GMOY005610 (TMP007718) scf-648683 14760:27560 reverse

MFKQTMANDLQPGKYVGLVADLMPNIKLMKFSGLFMHAFTSGSAVGKKIYSSIHLLALILL  
QFLSILINMALNADEVNELSGNTITVLFTHSITKFIYLACSQKNFYRTISIWNVNTHP  
LFAESDARYHSIALAKMRKLFFLVMLTTVTSIAIAWITLFFGESVKFAVDKENNSTMTVE  
IPRLPIKSFYPWDASSGISYIVSFIYQAYFILFALSHANLCDVLFCSWLIFACEQLQHLK  
SIMKPLMELSASLDTFRPDSGALFRSLSAHKAELIENEEKEPPPSNGLDLSGIYSSKAD  
WGAQFRAPSTLQTFNNNNPNGLTKKQEMMVRSIAIKYWVERHKHVVRLVAAIGDTYGVALL  
LHMLTATIKLTLLAYQATKITGVNVYALGVVGYLGYSLAQVFHFCIFGNRLIEESSVME  
AAYSCHWYDGSSEAKTFVQIVCQQCQKAMSISGAKFFT VSLDLFASQWSHISWCWCNLNE  
VIASFAIKFSSSSSLRPSLITKRNHGECISKISYLVYLYFV

>GmmOR2 GMOY005796 (TMP007907) scf-648756 29714:32260 reverse

MEYRAHLETNTAFRYHWLVWQLTGIIQPRYFSTSLYRLYTVLVNIVLTVLFLPLTFVINVF  
FSKNLQQLCENLIITLCDITANLKFLNVFLVRKELQQIKIILECLDKRLNTEEEYRQLKR  
AIRTAQLSFCIFLVISTTGTTLSLFMVLYSEERSLLFPAWYGLDWQKNDLAYAVCFTYQL  
VALVVQAIQNVANDSYPPAYLIILTSHMRNLELRVRSVGLSPANNKENMFLSEKEQQLDF  
KKFNDCIEDFIQINRLYDLIQKILSKACLAQFICTALVQC VVGLHILYLLDESDDYGAQI  
LSFIFFLAVTMEVFIICYFGHYMSAQSALIDAFYECGWIPQTLAFRRNLIITLMRTQRY  
AILYAGSYIPVDLPTFLLLMKYAYSTFTLLLRFK

>GmmOR3 GMOY004772 (TMP006862) scf-648228 109437:110684 reverse

MVVTKIHTWKAFEYHWRLWTFGLKPPRNSVWFKPYVAYAILLNISVTFPPCTLIINL  
ILAKNMNEVCENLYHTITDVVCNIKFLNMFLVRKLLQINQILKRLDMRAQTLEEITELQ  
RGVNSARNCFKIVGRFFCVALITSQLVAYLSPERILMYPWFWDWRASKMNFYAHSYQ  
LYGLTLQTAQNLGSDTYPQAYLVVLIGHIKALSLRIKALGSEVTPFSTSDDEFKKNENH  
LYRELVDCIIDHETINDLFRIVQQGISSTCLAQFFCTGLAQCTMGVYTFYVGLDYSKLPN  
LIAYFSAVTAEIFILCYYGDLFCQANEKLINSIYSCNWVDPHRFLLQRSQKINTVMAGNI  
IPVSLSTFVTVKTESYRLHLHFKSHIM

>GmmOR4 TMP\_Or4 scf-642438 111181:112437 forward

MFLDTLQFFRNWLSWRLLGIVLPKGEQNHKLIKYLLWSTIVNVVATFLFPLHLLLGIFQ  
EQPQSTRFESVAICVTSIATSLKFIIYARKLQHVKQMGKLFQRDLARISNDNERQFYQKH  
IRRNVIQITMFIVVYISVGITVTVAFIFSQERRLFYPGWLPFDWHRSIKYMAALGFQL  
ISIFFQILQNFANDCFTPALCLLSGHIELLYMRVANIGYVNRVAYQQNRNRELNECVL  
DQKHLYQLFDVIQSIISWPMFLQFLASTVNMCMAMVTLLFFVTDILERIYYVYFAAMCL  
QIFPTCYYGSDFEIKFERLHYAVFSSNWTEGTQCFKRHMMLFTERALRETRAMAGGVFRI  
HLDTFFATIKGAYSLFAVVITMKN

>GmmOR5a GMOY012018-PA (TMP002414) scf-639717 1: 6297 MW: 51399.66

SELDKRVSTADECDYFIRQHQRKANSIAKIFFFVYLG TNSFAFMGAIVDQRLMAPAWFPF  
DWKSSSTLYWSALLYQFIGLNMLIMQNLVNDTVGPMSLCLLSGHVHLLAMRVARIGYNKR  
KSQKYHEDELKLCIEDHQKLLKAFTLLESSMSWLQFILFFTSGLNTCLGVNFLFYSRIL  
YDYIYYGCFLALGVEVFPCYFYGSVLLLEEFKHLPPYAIFSSNWVEQSRNYRQNTTIFLEM  
ALKSVTMLAGGIVETNLDSFFAIYKAAYS LFTVILTMKIGYNKRKSQKYHEDELKLCIED  
HQKLLKAFTLLESSMSWLQFILFFTGGLNTCLGVNFLFYSRILYDYIYYGCFLLAIGME  
VFPCYFYGSVLLLEEFKHLPPYAIFSSNWVEQSRNYRQNTTIFLEMALKSVTMLAGGIVEIN  
LDSFFAIYKAAYS LFTVILTMK

>GmmOr5b GMOY012018-PA (TMP002414) scf-639717 - 1: 6297 MW: 35691.12

SELDKRVSTADECDYFIRQHQRKANSIAKIFFFVYLG TNSFAFMGAIVDQRLMAPAWFPF

DWKSSSTLYWSALLYQFIGLNMLIMQNLVNDTVGPMSLCLLSGHVHLLAMRVARIGYNKR  
KSQKYHEDELKLCIEDHQKLLKIGYNKRKSQKYHEDELKLCIEDHQKLLKAFTLLESSMS  
WLQFILFFTGGLNTCLGVVNFLFYSRILYDYIYYGCFLLAIGMEVPCYFYGSVLEEFK  
HLPYAISSNWVEQSRNYRQNTTIFLEMALKSVTMLAGGIVEINLDSFFAIYKAAYSLFT  
VILTMK

>GmmOr5c GMOY012018-PC (TMP002414) scf-639717 - 5069: 6297 MW: 33056.258  
MKIEWWSKLDSTVAYGRFWSFCRILGVADFRYKALSQFYVICLTLFVTVYCPHLLIGLL  
MLTDAGDFFKNFSMTLTSVCSLKYFFLRLNLNKIHQLIKIYSELDKRVSTADECDYLIG  
YNKRKSQKYHEDELKLCIEDHQKLLKAFTLLESSMSWLQFILFFTGGLNTCLGVVNFLFY  
SRILYDYIYYGCFLLAIGMEVPCYFYGSVLEEFKHLPYAISSNWVEQSRNYRQNTTI  
FLEMALKSVTMLAGGIVEINLDSFFAIYKAAYSLFTVILTMK

>GmmOr5d |GMOY012018-PD (TMP002414) scf-639717 - 1: 902 MW: 31461.035  
SELDKRVSTADECDYFIRQHQRKANS AIKIFFFVYLGTSFAFMGAIVDQRLMAPAWFPF  
DWKSSSTLYWSALLYQFIGLNMLIMQNLVNDTVGPMSLCLLSGHVHLLAMRVARIGYNKR  
KSQKYHEDELKLCIEDHQKLLNSMSWLQFILFFTSGLNTCLGVVNFLFYSRILYDYIYYG  
CFLALGVEVPCYFYGSVLEEFKHLPYAISSNWVEQSRNYRQNTTIFLEMALKSVTM  
LAGGIVETNLSFFAIYKAAYSLFTVILTMKIGYNKRKSQKYHEDELKLCIEDHQKLLKY  
LKYSYI

>GmmOR6 GMOY009475 (TMP011670) scf-651846 662444:668878 reverse  
MLLALSRGVGVKTQSSQASEYLFNVINFLAQDFHRKWTFGFFFQSFVANGTVVLFMPILF  
NLSYLNDSMQFDLGQLFTSVQAANICAIPKIFITMQLYMKNLHRINEMLNILDGRCKHP  
EEFSKLRHCAITGNRIYVGAIIVYFSYSISTCMGFMLTGQAAYNIYIPGINWRNSLFEFV  
IQGLVEFASMNLICLHQTVDYSYSGIYLYIIRIHIQILNERVKRLGSLNKNNEKQSYEEL  
IQSILDHKLILREGMALKSSRDNQYPLVAAISPMSLTIFVQFAITAAMLATTMINISFF  
SNVVGRIASIFYIILVFAQSSLCYQATCLVSDADELPVSIFHCQWVEQGYRFRKMIIYF  
MVNTQKPITFTAGKLFVNMASVLSNY

>GmmOR7 TMP\_Or7-RA scf-651846 655714:658243 reverse  
MESVIPNTVEDQOSGERHSINKGRFDSQLNINVTNNAFDRNARTMHGTMFLFNGFRF  
LGVYMPEKNRLFYLIWSFLINSTVTVYLPVAFILSFVKISGDDLQIGNLLTSAQVAINVV  
GCSVKIILMGFLLPKLLSTEKFLNRLDERCRTAEEELASINKFTKQGNRFVVLFSVAYWSY  
STSTCISAVAFGRPLPNIYNPFDDHHQSIGHFILSVLMEMTLVNIACFQQVVDSDSYAVIY  
VNILRTHVDLLLKRIKRLGLTVSMSHEQTYEELKLCIIDHKYIIQFTITATILGTTLINI  
LLFATNFASIVASCFYVLAVVVEIFPLCYTQYLMDESNLLAEVVFHSNWMEQNLPYQKM  
LIFFMQRSQRVMEFTAGKLPITLNSFLSVSES

>GmmOR8 TMP\_Or8-RA scf-651846 - 655986:662305 reverse  
MLVDTVADYKSPISSFEATTYLFRIYRVLGINKPQRHKNLYIFYTIILNGVVNLFQPIAF  
TMNYFTNELVSKLGSLLTSIEIVINVYGCTAKFIIIWLLPRSNATVQLLKKLDERCQAP  
DELELLKSIKFGRLVVVVLAVSYLSYSVSQFICSLIAGHPYGLYIPYINWKRSFWEFL  
VASSIEFLLMNVSCIVQASNDAYPIIYNILRTHIKILLKRLNRLGTGADKSQDEHLEEL  
KLCIKDHKNLNRFAAFSLFETIAPIISTTVFVQFMITAAIALTINMLFFTTNISAVA  
NSCVYIADLVLEIFPICYYANCLIDDNDLLSMEIFHSAWPEQNKIYRKMLIVFMQRSQQS  
MSLTAGKMF PINLNTFINLQYRFIYNFYNNICAIYNNCHHIGYDSY

>GmmOR9 TMP\_Or9-RA scf-652157 136730:138889 reverse  
MLTFRKFFKMAHFRGDGPPPCTRDAVLYLFRGITIIGLLTPASNKKCFYVWSLFINSLVT  
LYMPVGFLLSFIMRLSSFSPSEFFTSLQISINCVGASLKLFFVSLMYKRLIKATKYMDRL  
DKRPIDEQGEFTLRQAVAFSNCSSLLFTLLYLSYSSSTFLSSVINRRPPYQIYNPVIEWR  
NSTRNFIIQSAIEYVMIDVHCYQQALLDAYPVIYIMIRAHHLHLSRRISQLGKDDKLLK  
NQRYEELVQCVDLHKNIMQLYNLFSFVISGTMFVQFLIIGILGVTTIHIVLFANFFAIV  
ASLFYVASILAETFPESYLANSLMDDSDLSLAIFHSGWFNEEPYKQVVVFFLQHTQKT

LVLTAMKIFPITMNSNINVVVKFAFSVYTLISQMDLRQKLDKDSVAGQEA

>GmmOR10 TMP\_Or10 scf-644232 131824:133273 forward

MDGREHCRYLKTIFYKHQCWVFRFLFGLWKLSDMTRSHQLLHALYFNILTIVVLSLDASC  
IMQLVIKAGDLNEVIEVFSIFATALAVLAKFLSIKMKNHLYRQWCEIVESSTFRPNNERE  
IQLFQQSERLARLIRNAYCVLSLIALNMLIFIVDDRGLPLSVYSPFDMNRKWGYLSTYGY  
QYIAASICCYLNI AFDSL SASFLIHLKGQMDILCDRLKNFGKYSECNNDHKITEELKNCI  
KYYEEILKVAHLIEDLISLPISIQIICSVLVMVANFFGMAFLAEPGDYAYFFKMLIYQLC  
MLSQIYILCYFPNEVTDRSQTISRSLYSAEWFWSQMNRKLTLLMMDRFDVPIRFRSIIP  
TYSFNLA AFTSVFTTKRQQNNILLCFIKKHEQLKYFSANLKLKRNLRRTTKSLIGPKSNN  
RETSTADVKERN SWTEDELDEYS

>GmmOR11 GMOY0110761 (TMP012981) scf-652156 1267206:1269387 reverse

MDNSAESVKMLYSKQILIFRLVSIWDLAANAGYYKRLAFAVYFWIVAIFLVALFALLII  
QIFCDINNISEVIRVMFN LASLTVLGKFLTVMKMNRSFQQFDLLHSTEYLPRDLKEDK  
LFKRALQLSKTVLKVYGGMSLISINTTFLIQFAKDTTELPLPIYEPIDATVPWKYFIMYF  
YEYLGFGLCVMNIAYDSLGAFFIHIKQVDILSKRLEEIGHKSSSKQNHSHINEELKA  
CAIYYDRILELTHMMEDLMCLPLSIQILFTLTSEKLSLAIYRAGWVDWNEKNRKLALQMM  
GRDLPIRIKTINRCYSFNLA AFTSIVNSSYSYFALLKNFN

>GmmOR12 GMOY009271 (TMP011461) scf-651831 454103:455258 reverse

MLHVPITFTFTTLMWLKVIFSSNLNDVTDVLHMAFTETGLVIKILSAWR FARLLQFVFLE  
WQTNNLFSLSANEQLIWN DQFKSFITAFVYMSCSLSVVIFSFISVPLMKTYR LPAFW  
TPAGWEQSSYFWYICFYDFIGITFTCISNCTVDMYFCYLLKHITVCLRMISVRLVKLGY  
SEDVTKNLKEITFHNLKRM SRHCEKVISYPILGQILFSSMVLCF SIYRLQAISFIETP  
FDFLSVFQYMWVMAAQIYLPCHYCNELTLQSGALHTAIYNCNWIAMTAAERKTILLFMLY  
IKRPIILKAGHFFEIGLPIFTKTMNNAYSLLALVLNMSDS

>GmmOR13 GMOY003312 (TMP005369) scf-645812 24048:26362 reverse

MIDL FERQRFLRVMGHNFVRDRSQQSRRWHNTRCTYKYILCLFLV VSAQVPMINYTIYY  
LDHVELATASLSICFTNILT TVKIITFLLYKWEFAALMEKMEEMYEVRKAETKAKLKR  
NDYAGDLTRMYWNSCCCTGAYFMTTPILKIIWSKLQGM DVPEL PMPMRFSDFESTPGY  
EFCYIYTGLTTLVVIAYAV AIDGLFIGFTINLKAHFIALQSIHETNNFLKSESELQRDLS  
ACIGYHNKILSLAFKLRDIYRPIIFAQFLMTSLQVCVIVYQMVTVSASQYINAQHIFLKN  
CLFLCSILLQLFIYCYGGEILKLESLRVGVSVEISHWYNLKP SHRRILCLLMLRSQREAI  
IKAGFYEASLANFTAILKAAMSYITLIQSIE

>GmmOR14 GMOY001365 (TMP003388) scf-641298 67504:69789 forward

MFFKQWLPKADDALPSVNGLSRHFTVQQYTFAAIGLDPKSLQRPIFNKMLALVPMLGLFS  
LVIPMIGYASLYKSDILKVTDALSPVWEGLLALAKFFYFIWNRQKVIQLLRKIWIKNLEV  
SSNPEELTIIAEANHRDYLFSLTFCINVITGVLALAAPLIATFYTLQGEKFLNVLEPP  
LKATYPDFHTPNGLIALYVWDSL FVYFIIFGNLSIDGIFSWFTCNIAAHFRILRLRLKY  
AGQENGGNITKTTVNGCIDLHRQTIELAEFNKIFRVNVFIKFTISCLQIACLAFLVRG  
KEKVDQIFHFSFLTSVTLQFLLYCYGGQKIKDEVIMS NYGL

>GmmOR15 TMP\_Or15-RA scf-651027 85495:88783 forward

MLLHTLQLKRYFWVTRRSFN LIGIDITALDYHDIVKYPMRCFLFTAFAAVLAWAMTIHVY  
EYRDDFG EFADTSGMLLQTIIALWKT LVFLFKRKEICDLMQNVWQCININVPQEFHIILK  
FNSQNFTISALYMLVLSSTVFGSFLVPLIYMFEFYRKNGEKIWLPPQKGGYFWDYSNAIG  
YSVLYICHLLGIFFVAAFSIGVDTLCPWLVSNI VVQYHVMYYRLRDIAELS YEISTEKLN  
AKIIECVKCHRQVLNLSNQL ENFFAEIIFIKFVISGLLICS LAFRLVRAEGQFYILLYQL  
VFLT TVSTQLLMYCYSGQR LKNESQVASEIYSIFEW SHLSRNSQKLLLFAMMRSQRECH  
LTGAFFMVDLSL FVWVRERERDVCMYVKQK KKKKKR TNIFNFWFCLKKKS YHFVLLLVHVF  
LCYLLKVLRTGGSLIAMLKTLDEKQV

>GmmOR16 TMP\_Or16-RA scf-649095 5203:6553 reverse

MPDKKCAKFLSIQQRNLAVLGFDLNAAERRYLVKPLKLLFVLSCNFYWTYGLMNFAYN  
IENFDEITGSLSVFNQDILLFFKMFIFFAKADKYLNLIKSMNKLADKAKNQEYDEWSEN  
RLAELIAKVYSYTCRVAVAFSATVPLIYSVYVITYTAGELKLLKLPVKARFTLDGKLSYFAC  
NYITFVIHLNSMASLTVGLDSLYFWFIYNISAHFRILRKKLEIMAVNLKTNLQYSIQDDL  
GAIVVYHLEVIRFIKSMNEIFGEILWAEVTMSCLQMCFATHALMSDVDVSNAPFNIVVVF  
AVIIQLAIYCFGGKIREESISLCSDVYLLFPWHKMSMHQRRLMMLPLLRAQKEAYLKGL  
FFQVDRNLFFVFSKRIRSVTLIPVGFA

>GmmOR17 GMOY005386 (TMP007492) scf-648564 107291:115929 forward  
MSFRLGNVSNLNRKIIIVAYGLIETHLFKYHESNIPKICLNDLIRAITIHEMDYKFKKLE  
PHNYIKNGSDELNHIIVWLMKAYS DNILNSVETGLKDKCLEMILVATMWKIKQSLMNHFP  
SDPRKGQIGSIELNLWLAQMSGVSVMLRQNSSDINIFILY TALITILVTFVYTACEFY  
DLALNWDYDLNLTQNSCISLTHLAGLAKIINALYKLDIQQVLDKLYGLRITYTISKEQR  
QTFLDGELENKLLLSVYVAIVATTGLLGMFVFLSIQVLLHPVKMAGKTFPYRAVPSWV  
PFPLQLLYMSLSVLIFAMQIVADYLNINLLNQLRYQLNILNLAFDKLSFEKEQKNPAPH  
SRRLNAIIEHHCLLKEVCQDIESIFSVSILLQFFTSLIIFAMTGFQATVQSDASNEAILI  
YFYCGCICCELFYCCFGNAVTEQSKTLPIRSFNSSWYDYDGPYRKSLLVFLTNAQQPFV  
FTAGRFDLSLPSFLGILSKSYSYIALLRQLYGPLNLGAQAPGTVVFMFLAAFPSSIM  
S

>GmmOR18 TMP\_Or18-RA:CDS scf-648792 266134:274630 forward  
MAANLREELERSRLSHQKILKPLKVISLAVGVDIRQPTRFWNPVKILAIALIVNGFVGF  
ADYNFIRNNLNESINVYADSLISMQIISNIKLIHLILKQHEFYKVIKMAENSEILLNL  
REFELTTNEHKNLMQKIKDILKESWQDIHRQLSFFIYSCCAIVGWYWIVALAQNIHDLYK  
RSEHFTVTTTHPVKYPVWINKGPKFIIDPLQYINSAACNHISGFGAVCYDGIYVVLVHC  
AALVHVLRLVLEHSTTNEIPQARRVQYLLGCIRFYQKIFEFYSSIDGLFRIVNLIQYCN  
AIIICMIIFQASIGLEAEASLVVKMFLYLLAIGFQNMICYNGEKLITQNSLPIAWYSC  
CWYNESAEFKFLVRMILRTNRALYMKMSDFSTMSLMTMLTVIISDKLLFFFTLEKRQCG  
SMKAYAVQL

>GmmOR19 GMOY012322 (TMP008029) scf-648792 271039:283655 forward  
MSNMLIEVLKNEQKCNKTLKNLYKISFMTGVNIKYKTDKDPVKLVNLFITISLMGLC  
AQYCLVWHNRHESFVESADAICTANQAWISIFKMIYLVFVQHKFYDLLHAATDGNLLYDL  
GIFDLAINCKEQLLKEIKDILRDSWLDIRRLNFFIFSCMMACGFYMFSCFLVNYYYMHI  
NPQNFTLQLRAVCFDGIIVVVVHCSALFQILHQLLQHATDEDIPRSERVYLLCCVQLH  
DRIYNYAKINSMYKNPSLAQCLLSMLVLCVVMFMANVGLEEDITLFFKMLCFLMAAGFQ  
IVIICYNGQKIITQSGMSPSSWYNCSWYNESPQFKYIINMMVLRANRTLYLQVSGFTTMS  
HMTLLSIVQTSGSYFLLLRNLSGMD

>GmmOR20-pseu scf-652157 - 1785914: 1788436 MW: 36658.492  
MVLISEMSYVIMATMTEHFVKVIVNLSYIRVGVETKTRRLYKFPKRNTNQKAYQVML  
YPRNYRRTTMFYTFIHESLILTQFAYKNDKLDSSILKLSVERGPTSFICTAKFSWTHWH  
VATISQWFAFAPDSFTTDYAFSRIKENLIPDGHYERHKNTLKDIIRYPQSLRLSPFTCI  
TEWHHIVSVAKFSRQTNDSSHITMFASLCVINLKSTVQSIIYRKINYSIGNFFQPNVFQ  
TSKLIKLLLFPGCCLVQMFLIWASFQFHLSADIRYKMLLVVLEHFQKPPVLKATSLLD  
FTFFLLMQFF

>GmmOR21 GMOY011399 (TMP013635) scf-652170 3479799:3481562 reverse  
MASNDYHGGKANILYSIRDSERLDNLFILMIKYLKLTGQIPLDLSSYIPTFLSPIERWFS  
RLYGFLVLFVSLHVALFLAKNTFDILETGELEQITDSLVLTMIIYLFASFSSAYWMFRQKR  
LMELFQQINQLHRHSLAGVTFVSYRCSYNLAHKAVKYWNLWCIIGVFWALAPLCMGSH  
TLPLPCWYPPDALLPFIYELVYITQFWAQFNMGLLFGNGSALFVAIIIVLGQFDVLYCS  
LKNLDSHALLMSGQTLKAIKDSQSLQDDNEREVNQYLYSTEYLSLENLSQQILKKGDKS  
FKRRLHEALIECVHLHQFILKACDTLEELFNPFLIKSLQVTFQLCLLVFVGVGERSTV

RIVNFLQYLCLTLVEFFLFAYFGEMLRHRSVRVGDALWRSRWWLNAHLIKRDVFIFLINS  
ERAVKITAGKLTMDLDRLSVVTQAFSFLTLLQNMAEKQENEVA

>GmmOr22-pseu scf-641538 58384:59452 MW: 35047.4

MTIKIMQSFLFPMVLTIGYEFVHAKPTSKWLLCLKRVLTHFYCSSYSIKQMYDIARNGM  
PNVPLFLRLTSSLMYTISGDVKLLNFVIHLKQSKAMFKRFQYIYPQSLEEPHSYQVNQHF  
WSSWDYGILYFYLLSTFFIIVSPVTNSSIVISLSSAESWMVWRFMLRRSLYDGYGHGSRI  
IDIYSLSTHSCRTILCGLLLWSATDYFGNCYNLLTTYFKFFFQSKNIGNSAYNHRWYIA  
SSSYKKSILILIRAQKEADLNANSMQTISFEAFKILLYRYWVRFIALLLYLELC

>GmmOR23 TMP\_Or23-RA scf-652170 23283182:23286809 forward

MHLRTIEDVPLYQTSLRIMKFWFSLLDQDNWRRYVCLIPYVIINTTQFLDIYHSEESIDAI  
VRNAYIAVLFNTILRAVLLCINRLDYEFMDNIRLLYIDLMDSEDNVIRALVRDRTTIAA  
KYIAKINLLMGVCSCVGFVTYPIFATSRVLPFGMYVPGIDKHESPFYEIFFVLQVIITPM  
GCCMYIPFTNIIAVFILFGILMCKVMQHKLKQLHNIIEDEKAREVIIWCIKYQLGLINYVK  
TINELTTYTYLVEFLAFLGAMLCAMFLLLIIVGPNGDYRHLHIHDILTECYYSLFVAEAA  
DSDWDFDNVTTQKILHLLILRAQKPCAILVGNIPMNLEMLQSLNNTTYSYFTLLKRLYG

>GmmOR24 GMOY010839 (TMP013060) scf-652157 888049:890329 reverse

MKLYKFEDFVRLANLFYTSLGIOPYALGQSTKWQIFCRYLIFSFIINLSSMVVCEVTYV  
FLAFRNDNNFLEATMIMSYIGFVLVGFKMLSIWRQSLTTFVQELLRIFPQTPEQQRL  
YNLDIYVRQSTRVTVCFSLYMLLIWTYNLFAILQYVIYERWLMWRVVGKQLPYTMYILW  
DWHHDWSYPLYALECIAAGFTSAAGQISCDLLCAFATQLIMHYDYVSRSLAMYEYVCMRQ  
KFREPRKAMAEDMKFLTNIAYHANVLSLSELMNEVFGVALFFNFMASSFVICFVGFQMT  
MGADPDTLFLKFLFLFTSASQVYLISHYGQQLIDAQWYNADIGYKKMLVLIARAQKPVE  
LQATKFLVLSRGTMTDVSVIKKYQKYFD

>GmmOR25 GMOY012357 (TMP008534) scf-649009 35111:37791 forward

MSADQSTSTNFNSFVKGPKNMFKLLGIKQKQGNLISTMYTSFVVISATIVAILQLCHI  
LTSDTSDPHRVQNVVYITYFTVGLGKILNILYRRSILIECLSELEGIYDPKEMERKYSLQ  
HYLKRYKRAEYFFWNFAMFLISVYNIETIVRSLLQLYLKGRYGYLLVRIYAPFPYDGLK  
LVYLCYFALGSITGAWIAIIIAADLYLLGCVLQLCLHFELLTKQLMELDTRILTESEAI  
KRLNAIAKYQSELIRLSRKVNRTFSGSMIVSLTAASFIIICFLFQLLGDVQLVDIAMVLI  
LLNESKQVLLICYCGDKLLNSSQRFNESLYMHNWVDGVSRYQHLLFMLLYARNPIMLN  
LLDITDITLVTLKEVLVVKTLGKRI

>GmmOR26 TMP\_Or26-RA scf-652170 7565092:7567386 forward

MLTVREVTSPFRFYNFVGIKLFQWDDNDTLTKREKYTLLVTLIIFVMNFVCKFSCFVLR  
KYEDAQELTKLISYFGFACNGVFKMLSVWIGRKTTHAVIKDLAKNFPRTASECHEYKFYE  
QYAFKLRHMYLLSLIHWSIAITFMLFPVQSFIEYLVNFNDNGKFIYRFPYIMYIPFDHH  
TPAGFIFAYITQLIGGITHSYFCGSDCLLATVHLVNMQFVSLAVRIKKFKPQTYEKDL  
KQLRKILKLHISAHQNAKLVNDVFSISIFLNYLISIAVLVMIGVQVISGSEFWEFKFGV  
FLIASASQVYYVCLYGSLLLDYEWYFADNRYQRMVILAIARSQRPAHLTAYKFFMISMES  
FANVRLNHLTRNCFVLMTTSYQFFTLKARMEEQN

>GmmOR27 GMOY008038 (TMP010200) scf-650866 8500:9930 reverse

MDEEVIVTIKEFFDIPLKFCLTLGIRLYKWSETERTTILQVCLLSNLLLHTSVYPPFLVI  
YQIKIDPNDLLGRTSSLAISLFCVNAVSKILFVARHYKDLRKIIHKLIKYFPPTSSGGQKN  
FNLHYEFKTMRRVSSIMLWTHLITAVLFDFTPPITFGIEMNSGGKKEFNFILPYGIWYP  
WDHEDSAIMFVFTYMTQLLGSYVAVVSFVVPDLLLISVVALANMNFYISKLIREFHPTG  
TNEDFKSLGQILHYHDDILNMIDEVNDVFSFSVLLSFFGFGGLLCLVAFNAVVGSSMLDI  
FSQTLFILSILLIMYYLSAYGTEMIRLVNNGNGNEIEMKFKTRQKQTIFQSTDVSVALTDH  
PWYDGSIHQRMLPFIARAQRPAQLLGYKFFVVSMEFQSLMTTSYQLFTLIKARYDED

N

>GmmOr28-pseu scf-650866 82839: 84829 MW: 29955.6

MNGLNYSNVPLNIIEMSHLTKTQRVSTISLAFSITVIYLMVYSIPGITMNSVCILLHFWL  
KCVCMMGGGEVGYLAVISFVNPDLLFISIVALAYMNFKHVSKLIQELRPEGTDEDLST  
IHARYFNLSSVYIVQSIDNVLLVCAYGTEMIRLVNGNEIEMKFKTRQKQTFQSTDVSA  
LTDYPWYDGSIIYQRMPLPFPIARAQRPAQLLGYKFFVVSMECFQSVSRYRHRLRFRYLF  
YSLFIIPVATDNVLSIIRFD

>GmmOR29 TMP\_Or29-RA scf-652141 245471:248227 reverse

MVRNSGAKPMVVLDFFKVPFLILQKFGVCVYRTSSKERLSVKEAISFAISMVQIGAYSIL  
VPLFFIKTTPPTTAEFSDACIPLILFFTSIVRLTSILVNPKRIRTLVDIFQKYFPQNMEE  
QKNFKVERNYKELIRVTKALAICLSLGCVLFSLAPLNFAMAYYTIGDEAKFDYRMPYPI  
WYPFKVNTPGMYAIMCSTQAFAAFSCVCAYFLPNMVLITSMMLINMNFKHLAKTVRNLTP  
TNTDDDMKNLSKILGHHQDTFLLVDVTNEIFNISVFISFFSSIALLCSIGMNVLGESQPY  
HIIKQSLLLVTSFLDYTYTCKYADDMKTSVRNIWLNSVYRVLTLLVHFAARGANEVRIR  
EHATRNYISKPKTKYSLDMSDALAEHPWYDGSVYYQRMLLFPMARAQRPAQLMAYKFFAV  
SMESVLSVNTNIAYLTSI

>GmmOR30 TMP\_Or30-RA scf-652141 215509:218352 reverse

MVRNSGAQVMVVLDFFEFPGFWMFEKFGVCLYRTSSKERLSLKEAISFAISMVQIGAYSIL  
VPLFFIKTTPPTTAEFSDACIPLILFFTSIVRLTSILVNPKRIRTLVDIFQKYFPQNMEE  
QKNFKVERNYKELIRVTKALAICLSLGCVLFSLAPLNFAMAYYTIDDEAKFDYRMPYPI  
WYPFKVNTPGMYAIMCSTQAFAAFSCVCAYFLPNMVLITSMMLINMNFNLVDVTNEIFNI  
SVFISFFSSIALLCSIGMNVLGESQPYHIIKQSLLLVSSLCDLYTYTCKYADDMKTSVRNI  
WLNSVYRVLTLLVHFAARGANEVRIREHATRNYISKPKTKYVLTNSYQLLTLVKARFDV  
E

>GmmOR31 TMP\_Or31-RA scf-650238 26161:28277 reverse

MIPQFLRDDYPLEKHLFLIPKFALRLIGFYPESKLNTPLLCWAFFNFLLLGYSYAEFTY  
GIHYLTIDMQTALDALCPVLSSIMSFIFFIWHRSEYKHLIEEVRRLTAAQSSRKNVH  
IKRKFFTIATRLTALVLFDFGNTSTAYTVRLVISNTILYLNQQPMPIYPLTCILSHWHGY  
ITVAGFVGADGFFLGFCFYFATLTKMLQQDLSDALAVNNCKSVNATMYLALLDKNSQAIR  
CEADMVSNLTDIIRRHNEIAQLMKKFSSIMVGIVLSHFITSSLIIGTSFSGYAILVYIVH  
TCAVIAEISLYCLGGTAVMECVIPSSTKSSPGIMPFQNTETTNLHTNFQNSSSSKRLAN  
EELALQAYCSQWYDYSVRIQKMILLIMVRSQQTITVKVPFLTPALPMLAAVCIVIVYPAI  
LRFAGSVITLTKTTI

>GmmOR32 GMOY005084 (TMP007180) scf-648410 219323:223133 reverse

MFNPVPANDKRFWPRQCVWLKLNKSWPLKSTKEFQSEFYTTENYSSFLYILWSWYVILS  
VGVTIVYQTAFLITNFGDIMMTENCCTTFMGALNFVRLHMLRNQNFRRVIEQFVNNI  
WINRREHHPQVAHECENRMSTFRIMTILLSCLIAMYCLLPLILFVDVGNAPKPFYK  
MLFPYDAHNGWRYAFTYVFTSYAGICVVTTLFAEDSIFGFFITYTCGKFRILHQRIDNII  
SDSIEVTSTRQNDNNVQRIFEKLLNEIAYDHNKLIERFSNRLEHFFNPILLVNFLISSVL  
ICMVGFLVLTGQEMFIGDYVKFIVYISSLSQLYILCWNGDDLIQHVSRSSTETAKHLYGC  
NWEGTTLNIRNAKKFKWHRAEEFHLTSIHPTNKEFRQNLQIMILCSQRPVKITALKFSI  
LSLQSFTAVILSTSMSYFTLLQTVYNADQEEDHNIN

>GmmOR33 GMOY005479 (TMP007587) scf-648614 40250:49045 forward

MFEEIPLIYMNVKILKFWFLFEKNWRRYLCLPATTFLVFTQFVYMFKTKEGIDSIIRNS  
YMLVLWFENTILRAYIMIYDNDKYQQVIHELVELFYDLKKSDDYVKDLLLEVNSKGIIMA  
RGNLFLGLLTCIGFGVYPSLAVDRVLPFGSIIPGINEYSSPFYELWYIFEMCITPIGCCM  
YIPYTSLIVSFILFGVMSKTLQHRLRTLHRIANQPKLIHAEIISCIKYQKRIINFIEAV  
NGLCTFIFLLEFLAFGALLCALLFLLIIVNSSGQAIIVCAYIIMILAQISALYWYANELR  
QENFAIAAAAYETDWFYDTIVQKDILLVILRAQKPCSVFIMFFKSYNEILFL

>GmmOR34 GMOY011902 (TMP014141) scf-652170 25006662:25007967 forward

MTIKIVQSLNQLKQFDDYIWFNPAVLKTIIGYEFHAKPTSKWLLCLKRALTLLEISAHFYC

SSYSIKQMYDIARNGMPNVPLFLRLTSSLMYTISGDVKLLNFVHLLKQSKTMFKRFQDIY  
PQYFEEPHSYRVNQHFVPSWVNVILYFYLLSTFFIILLTVGYAEAHFFYLKCEDELPYSFD  
HPMKLLLSLLFIAFYVWRFMLPRSLYDGYGHGSRIIDIYSLSTHSCRILCGLLLWSATD  
YFGNCYNLLTTYVVKFFFQSKNIGNSAYNHRWYIASSSYKKSILILIRAQKEADLNANS  
MQAISFEAFKIVLGAVYRAFAVFRMLK

>GmmOR35 TMP\_Or35-RA scf-648722 141939:145983 reverse

MSSHSLKLEDNPMLEINVKVKYLSVIFPDREHAWRVYVFLPVCVMNIMQFVYLLRMWG  
DLAPFILNTFFAAAIFDALLRTCLVIINRDKFEAFLELAEMYRDIEESKDDTYGRELLR  
AATATVRKISIFNLTAFFDIIGALYPLLCEGRVHPFGVAIPGVDMTASPIYEIFYILQ  
FPTPIILTMYMPFVSLFASFAIFAKTALKVLQHRMNSIFLYNYRTEEHQFAALTACITY  
YSRIARVPIWGDYMFALAILHEYCKCSCCYCCLINFLILTKLYFKIDSSTQIVSIVMYIL  
TMLYVLFYYWHANEVIMEVGHRLMFSNLRKRTTFYCCRVLKCLRQLMGYRGIIVVNAFI  
MVGNVYPMTLATFQSLNNTSYTYFTMLRGLYG

>GmmOR36 TMP\_Or36-RA scf-648722 191876:198790 reverse

MYYRLPLFSVNVKGWLYFGYIGKRNQGIKSLNALLTLAAEILLYIKTEDVSNVIRDI  
FKTAILFNSLVRILYVMRREEDFIQFMKGIESWYQEFKDDNDHMLAILNRLPKYTKLVT  
AFGLSFGSIGAVASTITALLWHTHIFPIYVPGFDAFQSPLYEIIINLWQSITMVSFVMSAY  
ILFTNLFISWLIFGIGLLEILCKKFEQMSSANDAERLRNLKYLIRYHKRIIRYGELEDL  
VALISMVELILFTVMLCVLLVFFLITENFVDQIATVIYIFSIFYVLFISYWHTNAFSAES  
LKIPDAAYRIDWAESGPETRKCLLILISRSQTALQISESNRYT

>GmmOR37 TMP\_Or37-RA scf-648373 4213:5709 reverse

MNLLYRPKLSDGKLVRLSWPIAMFRLTHIVCWPLEDDAPRWAYVFDRFCWFLAFIVFVLT  
NDAELRYLRVNMQNLDELLNGVPTYLVLIEAHIRGFTLGyrkNKFKNLLRKFYTDIYVDE  
RQHPSFYKKIQPRFWPLYVFSSMYVATLTNFIVTPLALLLTRGSRELTfKMIPLFDYRYF  
PIYLPCLLSNIWVGFLVSLFSAEPNIGLVVLHLHSRYLIMNENLRKKTENLLKNPSNT  
EIARRFRKIVVETIDENKRLNLFAQEIQNEFSFRIFILFSFAAMCLCAVASKVYMSISI  
GRKSLSLNSIFFHFNDVSQNPLGSFAYIFWMFGKIQELMIIGDLGSTIATTDEVSTM  
YYNSNWESVIARSSDCENVRLMKLLTMAIALNRKPFYLTGLNFFT VSLNTVIKILQGAG  
SYFTCLISFR

>GmmOR38 TMP\_Or38-RA scf-648495 88188:91340 forward

MIGILPREWSEEHVYYSLAHTLLIAMGSMFIVTVACDLYEARQNLTLLGDDIVVIIGGSL  
IMLKIYFHGQHSSEIHPIVDKMNDLHKMFAEYNGRSRLTIKRLQCSFYLFVFAFSFYIF  
LIVLFASAVMVPPLLTHHGLPYRAHFPILRWENSdqHPiGFVIAYIFQVIWTFHALLSIV  
CMDLACGIFLQTALNLKILCIRLREISAQNVEERESLNELKSLIKIHQYIINLIEKINA  
CYLNYVAQMGASTFMICLTAFEALLAQDRPMIAIKFEIYMLSAFLQLLYWCCAGNLVFF  
ESLNVADAAYEIPLWYTRSKEFKMTVAFLIRRAQKPLQFRPSPLYGFNIKTFTSILSTSY  
SYFALLCTMNK

>GmmOR39 GMOY004392 (TMP006475) scf-648080 333109:334447 forward

MHFYKIDEFFLILHPLQKYTRWIYDFRRRDSSVPFEFQSMTKLKISLAFVLFELICNFI  
KFAIEIRADRLSEAKQIAAVTSIALLCMIRGISLYTDRNRMLAICNDLDKIFPNTFYLQR  
RMRVQKLAFAFFKVRFRVLSYLYGLPAFASIPLIRYFLFYDRENGGRLLDEYHQHASWA  
PFQLKQNNRAYPYVYVYETFLTILGFTCILTWDHIFTVTVSQLTMHFVFNTELESNVR  
DTTRSMTSKFYWRRLKEIIVYHQHVYRLAKKLNFTNLTIFLTDIGCAGSICFHLYLIAN  
SDSVLTIVTFFFPCFILIAFTFDYCCQGSRLAEASARLQTVLYNQEWYDASPTYRRLMLS  
LLQYAHKPFTLNGFKLFDLMLHFQSIMTIAYRLFAFVQTQGK

>GmmOR40 GMOY012356 TMP\_Or40-RA scf-649009 40802:42730 forward

MVEIKDLQIRPEVCQNPLIVHLLKSMMLYGFIVSTEQKHKRFSLRGAVFTISFVISCAL  
IVSRGFESLAAGATSCATAFLYLSTISITIVNAFFQRARVVRMCTFLHDDINKLMELADER  
EKKMFAATVKYLRVYTAILWTPSVFAGFIAYADCFYRTIFMPETVFNIPQVLRGEAEPIL

LFQLFPFGEVYDNFLVGYLGACYALFLGITIIPCWHTFITCLMKYIVIKFQIINKRLEAM  
DISKLSPKFSLQPDMDNLNEKDLDNYWRLKMCFCVQEQTNIKW  
>GmmOR41 GMOY006480 (TMP008603) scf-649048 4425:5787 reverse  
MPCLDRFRKFIGAASLIARFCACDMFDETYTMFNPLFMVLLGFLAIYTVCFVYTIYDGFV  
TNQDWTIILQCLTIGAMALQAISKYACYIHRRTLRKVVKYLDEIYGEYQDRGARYEYAL  
KKSLLQKIMKCSKITGIIYFTSLAGLIVSFIYMLITGKRELTLIALIPGIDPKETVGYFI  
HTGFHSAIISFAGVGFASEIVMFSIFLHVLLHRDILMEKFHDLNEATAKPDVPAARTRD  
LLNDIIAWHQKYNLFVKYIEELFSGVIFVHVTTSCASICSTLFCIVLKVWPFAPVLLLLN  
TSMYAYCGFGQLLATNDDVTRMIYEVCIWYRLEVKEQKMILLMLRKSQYAVELTVGKIM  
PLNFNTALQLSKGIYTYLMVNLINLE  
>GmmOR42 GMOY006479 (TMP008602) scf-649048 15:1464 reverse  
MPPLDRFRKLKHLRVVRFACDMFDETYTMFNPFMVLLLLCLAIYTVCFINTIYDGFV  
INNDWTIILQCLAVGAMAVQAISKYLCYSHRITLRKMVKHLDNIYEEYQSRGTRYEYAL  
KKSLLQKIVKCLKVAGGIYFTTIVIGLIVLPIIYMLITGKRELSTALIPGIDPKETVGYFI  
HTGFHSAIILFSGVGFASDTIMFSMLLHVLLHRDIMVAKFYDLNEITEQDDKSAERSRP  
SLNDIIAWHQKYNLFMEYIEELFSGIIFVHITTSVCISCTLFCIVLKVWPFAPLLLISN  
TSMYAYCGFGQLLATNDDVTRMIYEVCIWYRLEVKEQKMILLMLRKSQYAVELTVGKIM  
PLNFNTALQLSKGIYTYLMVNLINLE  
>GmmOR43 TMP\_Or43-RA scf-651490 579:1910 forward  
MSPLDHFRLKLLKHMVMVRFACDMFDETYNINPVMVLLCLAIYTACFINIYDGFV  
INNDWTIVLQCLAVGSLAVQVIIIKIIYIYIYIYIYTYNIYMIKMKVHLDTIYDEYQSRG  
TQYAYALKKSLLQKIVKCSKITGIIYFTSLAGLIVSFIYMLITGKRELTLALIPGIDPK  
ETVGYFIHTGFHCAIILFSGVGFASDTIMFSMLLHVLLHRDIMVAKFHDLDNEITEQEDK  
PAERSRPLLNDIIAWHQKYNLRTYAGGYENGRSQVFPCRFEYIEELFSGVIFVHVTTSC  
ASICSTLFCIVLKVWPFAPVLLLLNTSMYGYCGFGQLLVANEDVTRMIYEVCIWYRLKV  
KEQKMILLMLRKSQNAAKLTVGKIMPLNF  
>GmmOR44 GMOY006265 (TMP008385) scf-648928 37939:39536 reverse  
MEHELTCIQRFKIIVLRIKAKMCGCDILNPDYKMNFIWLLIVGVNGFFLCTIYTIYK  
GMTIDHDWTVIPVCMCIIGSGIQLAKILLVLKYRKVIVEQQYFLENVYTVYQQKTERYR  
HVLNRWLEYTVKTYRICASMYVFGVTIIIFPYIYWYIYGIRTMIMQFEIPFVDPNHTHG  
YIIHTLYHFPMIAWGCLGHFMTDIYMFMFIINVPLKDLLEQKFLDLNEIILEETNESEKV  
LPLLKDIQWHLKYNEFIAGVDKIYRTIIFIEITCGLSICCTIFSIVLDVWPAAYGYII  
YLIFCLYSFCIMGTLIEISNDNVIEIYTISHWYKLLKLPKELILIMLIKSQKPIELTVG  
QILPLSVSTALQVTKVVYVSYFLMLLLNLLDK  
>GmmOR45 GMOY007896 (TMP010054) scf-650705 207676:209075 forward  
MKLYSERYQEILNVSVTLKLCGINIFAKNFRMNLITWFIIGIIGLYFILFTYTVYVGIQ  
NDWSIVLVKVTMSTTATQGLIKLQNFCLNPKTLRKLAEELLEVYLEYERRTNQKYPKYLQ  
RSIALIKRINYAVLAFCLIALSTVIVWPLIFSYVKGEKLLVGSMPRIPCVDKNGWGFIIH  
FALQSVMLIIGAYGNFAADSYCFLLAHTSLFKDLYCKFQDLNEILQQYPRNSLRSP  
LQDILKWHQKHVLFETASSIYFWVILVQISTAVTGIVTTLVCQFLGIYPTAVGYLIYCA  
VLFYIYCGIGNLYERVNEEVINIICDSLWYELTIDEQKLILFMLHKSQTVEGLTIGNLIP  
LSLNTALKLTRFMYTLSTMMLLQFLD  
>GmmOR46 GMOY003305 (TMP005362) scf-645804 155235:156578 reverse  
MIVACVDHFRKLVRIFRCAGICGADFGDRNYPWNPLVFTLSSIVFFTCTVYTIYAG  
LVYDNDWTVILQCLCLASSAFQGYDPKNRECSDDRYEARRFPLHNSYIACASAPLSIN  
FGKRLFIMRFFIPGLDPNSTMGYFLHMLIQFMCIFFGAFGNFSGDMFFIVLVLHVPLLKD  
IITEKLNELNRTQLKRNKLLKDTFEWHQRCNLFIEDISELYSEIIFIEIFLCCGLICCT  
TFSIVLSLSAWPAAPAYLLFTLVAMYVYCVLGYTIEEASDTLLRNIYTECLWYELAVQQQ  
QMILLMLIKAQSPVVLNIGKVMPLSLSSALQLTKAIYSFLMMLLNFLLE



>GmmGR1 GMOY007472 (TMP009619) scf-650411 214655:216066 MW: 48775.35  
MAFWAAATGRTSPSKVVPVLNPNQKQFLQDEIRYREKMNILARTDAGNLTDDYVVRKQETI  
DDPELLDKHDSFYHTTKSLLVLFQIMGVMPIHRSPKTNLPRTGYSWTSKQVMWACVVFA  
IQTTLVVLVLRERVNKFVTNSDKRFDEAIYNVIFISLLFTNFFLPVSWRHGPQVAIFKN  
MWTNYQLKFLKVTGTPIVFPNLYPLTWGLCIFSWLLSIVINLSQYFLQPDFELWYTLAYY  
PIIAMLNCFCSLWYINCNAFGTASRALSDSLQTTKGDKPAQKLTEYRHLWVDLSHMMQQ  
LGRAYSNMYGMYCLVFFFTTIVATYGSFSEIHDGATYKEVGLFVIVLYCMTLLYIICNE  
AHYASQSVGLDFQTKLLNVNLTAVDSATQKEVEMFLVAIAKNPPIMNLDGYANINRELIT  
SVGIT

>GmmGR2 GMOY011510 (TMP013746) scf-652170 18996209:18997720 MW: 49157.684  
MDIITEKEFDSTLDSSVLTDDMEKLLKSEKRKKFIKNSNHNPDLMERLTMRAKRAKLSR  
HGQTAELYDQFYRDHKLKLLKLVILGVMPLARQAGRVTFWSKSYQMYALVFYILTTLVV  
LKVGSERIKLLHTTNEYDEYIYAIIIFILFLLPHFWIPYVGVGWVANQVAHYKSMWGTQVR  
YYRVTGTTLVFPPLKIAIIIFIGCVLLSILFLFSLSQLDFFLLWHTTAYFHIITMINM  
NAALFYINSKGTKIASKSLSDCFKDMRIECNYIMIKQYRLLWLNLSEILQALGNAYART  
YCTYCLFMSINITIGSYGALSEILEFGFSYKVLGLVVTIYCASLLFIICDCAQSATSVM  
AEGVQSTLLSLNLLQLDVQTQKEIDHFISAIELNPPVVNLRGYALINRELLTAVNFYLHY  
IHAFI

>GmmGR3 TMP-Gr5 scf-652170 18992721:18996270 MW: 59057.336  
MPSSINIYPLDNIFKMYSVLEEKVVAENINFDLLRSDLKVNKVDNINKHKINSMDLIV  
QEKEYERFERSRLNSSDGDVEIHDQFYRDHKLKLLILFRVLAVMPILRSEPGRITFSWRS  
IATVYAIIFWFFMTVVVIVGKERIHILQTTTQFDEYIYAIIFVIYLVPHFWIPVGVGWV  
ATEVAKYKTSWGAFLRYFRVTGTSLQFPRLKSLIVVISVGCLLCAILFLLCFLLEGY  
PLWHTLAYYHIITMINMNCALWYINSRAIKTASYSMALCFRKEVMKDCSASIISKYRFLW  
LNLSELLQSLGNAYARTYSTLCIFIVNIVIAVYGAFAEIVDHHKHYTISYKEAGLIVDV  
VYCCTLLFIFCDCHNATLGVAKGIQKTLLSINLLKADLEAKNEIDLFIVAIEMNPAIVS  
LKGYYVTNRELLSGSISMITVYLLVLIQKFSLDKSTTNDKRNQFVLTFLFLETNDQLMLSF  
VSLGNNISKLMKNTYGYINGKRIRLDSGFVCVNR

>GmmGR4 GMOY008001 (TMP010160) scf-650833 228463:237409 MW: 55967.164  
MLNNYNRKKKHDTVFLNVKPAANGIGVRKYSNGILDRIDSGFGINYDNEKRASRHSVGTI  
DSMNQQFVFNIFRNAPVKWFLSVIGVLPMPTRPGPSAKFTIGSLAFVYSILTFLLTL  
YVVYVANNRIRIVTSLSGPFEEAVIAYLFLVNILPIFLIPLLWWETRKCICVLLNDWDDFE  
ILYYQISGHSVPLHLRRTAVTVTVALPLLSVISVIITHVTMADFQLSQVIPYCILDNLTA  
MLGAWWYLICEALSRTANILAEFQKALRHIGPAAMVADYRALWLRSLKLRDTGTATCY  
TFTFLNVYLLFFIITLSIYGLMSQLSEGFGIKDIGLAITAVWNVCLLFFICDQAHYASFNV  
RTNFQKKLLMVELNWMNSDAQTEINMFLRATERNPSNINCGFFNVNRNLFKGLLTTMVT  
YLVVLLQFQISIPTEIHNTNVNMTLDDDDYDDDLLTNAIVTTTTTIAIKGRKDPGGGHG  
IATVAISRSLFMRKL

>GmmGR5 GMOY004207 (TMP006286) scf-647997 53981:55829 MW: 53912.25  
MSQQHQQSCSYVLLHFSLFYLCFLGIYPQNLSAYRNKHSLEASKNGSFLVVIVMIWII  
VCYNTFILSQSEGKDHREANHNALNFVIGIFLTQIKIIVMATDQLSSICNQGRLAEFYNR  
VYSIDNRLIKEGCLLNGLSLALHCYVMVVLTFLEIIIIILTFVNLINYTQWVLMWIFS  
CLPTLYDSLDKIWFTTSLHALRIRLSALNKTLTNLKGVKEKSIFKRFYEEECNELSLLKI  
DYVNGLEYLKRNLNAGRNVKFNIRSFNIFEQKSFADKFINVEKVKERLTNICQLHD  
EICELVQTLHKMWTCPILALMAYGFLIFTAQLYFMYCVTQKQIPILFRSAESLLISILF  
LSYTGVKCIYPIFLSWKTVLEAKCTGIALHEYAINLNDKAVYEIVSVNHLSLKLNLHAFD  
FANCGFLSLMRTLCLGLSGVITSYTIILLQFNFAAQQSKEADLMGME

>GmmGR6 GMOY011615 (TMP013853) scf-652170 14942509:14944789 MW: 50882.254

MTFWRDFIKPSDSYAAEQTLWTTFLMGLTPIRISSERNGERNIYISRAGYIISIVQVS  
FFLYSFIYSFLMDESIVGYFFKTEISQVGDVQLKFIGMSGMLILFGVSLYKTNDLMELYH  
VVAKIDNQFLGVGVEFNRYRFIMKFRHSLMFIISICSIYIGGSFWMLFHNNVWPTFQAIV  
AFFVPHIFLLSVVTLNVAFIMRFTQHYDLINKVLKNLRHQWETRSIKTISHKQKSLQCLD  
SFSMYTMVSKNPCDVVQESMEIHQLICEAASTANKYFTYQLLTIISIAFLIIVFDAYYVL  
ETLLGKSKRETkFKTIEFVTFSCQMMMLYLVAIISIVEGSNRAIKKSEKTASIVHALLNK  
AKTPDVKEKLQQFSMQLLHLKINFATAAGLFNIDRSLYFTISGALTTYLILLQFTTNSSP  
PSSSDCTFNSPVTSPIPMNSTST

>GmmGR7 GMOY006209 (TMP008329) scf-648889 6876:8857 MW: 46324.344

MDVENQNNLPLARPAYRNRWRSLSAKGLYESLQPLFLLLYWHGLMVYSIKANADGKKEKEL  
RHSLWSHLNVFFHLTYIVCYIMTVMNNFESVAGYFFQSKISRFGDFMQILSGFIGVTVI  
YITAIIPKHYVQNCLQFIQEIDQCLLRVGVIMYSKILRYSCIFIVAMILIDILYTAASF  
QILKSANEEPSLYLHITFILQHTVVLTAIAMFSCFTKLIARFTMLHKKSLQCFDSFSTQ  
TVASKSPCEIVQESMEIHQLICEASSMANKYFSCQLLTIISTAFIIVFDAYYVLETLLG  
KSRRESKFKTIEFVTFSCQMILYVIAIISVVEGSNRAIKKSEKTGSIVHALLNRAKTLD  
VKEKLQQFSMQLLHVKINFATAAGLFNIDRSLYFTVMICETIH

>GmmGR8 TMP-Gr4 scf-651593 207733:209113 MW: 47166.812

MYIKVRSLKSQAVRKWSGKVKHQSIRQENDVILNDLRIIMFPLKIISLIPLYGSASSYEL  
GPPTKILYTIVMRFLILVIPVYNLYNLYLNSTETSNEPEWIDSSLNFLNYIITISFCTR  
HYQLLEKIINGLLKFYEEMKEYGKCVDVTEARFSITFTIIMTLQCCVVILKIVAIIDVPL  
AFNISIESVLYAFQNIIVPDLYIIFISSLMRTIATQFSNLNNIATASTCGIYEGTIKNQIS  
SNTLVLGFLQMYRKLRIHKFISDYCTFILLFYVGYAFFSITSKTYIYIFVWIISPQEIS  
QSEVSLSFHILVMHMLLLILLCRCFNLVARKVFQTTNVKYVKIPRSKFKPGYMPYQGWIR  
VLVVLTTLSCTPVPNWNFKICNRTLIFIYSRTLKQFGAEHPKRTGSL

>GmmGR9 GMOY011903 (TMP014142) scf-652170 23328288:23329768 MW: 39397.14

MDIVESISVLQTVYQLANLSPWILDKKTWSFLQSRVLELYTTIVIIIGSSALMLYSLFTDD  
ILVKASDNEIGQTVDSVQMVGIRMAHIASVLESIRKNDQKKFYDDVKEIDRIFESSLGI  
TINNRIIKERLNELVAALDEVNLTAEPTPMRTRMAQNHSGHVFSKPRQQESNIENSP  
LTKLVVIRNIYDRLHSQSVINHCFCGVSMLINVGNDFISITSNCYWIFINFKDFSSTVID  
FLQIACSAIWSVPHLLNVLVLAIFICERTVHTSVDMALILHRINSNFNNDKYGSAVTQFSL  
QLLHQKLSLTAAGFFTIDSTLLYTVIGATTTYLILIQFHLNEMKPNT

>GmmGR10 GMOY003231 (TMP005286) scf-645661 235649:237209 rev

MEFSNCDLLYDHISRLTLPSTVYHELMFASVMDKGLLILSWIYGVSPWNISRRSYCCNIL  
DYGQMLMMLFFYLTCYALVNFDFGFIYQAPDCNGFCRLGNQLFLHLGCLLYLTTQLLAMK  
SRKKFCKKFEQTLINMDRSLETCQLDERGEMSMKRNQSLHFLYKTAMTLGLLMLLIYEVR  
QLTYFYGHWWFFVPLMVTTPYSAATVMLLQFAYYVYKISDRHQIINQFLEQINQDIVKTP  
KEITPEIFNVESEIKITSSGNVQLNERHVKQTTTHREENDYNEDSMKFLESSTKRYATT  
SLTKLFKMFDSVLSLSVLTNSEYGPHCVPYMSACFVITIFCIIFFQIKIYHVVGKSRLLD  
YIVFIYFIWSFVTMLVTYIVLRLCCNASGEAKQTAVIVQEIMRKRPAFMFGVDGNYNEMK  
SFLQLSLHWEEYFQYNAIGLFSLDYTLIFTVRKKRSRK

>GmmGR11 TMP-Gr3 scf-652146 202807:205545 MW: 52777.453

MLQRKRKNTKTFVCRATNKITDFSNESNQNRMKSLELQFHRALRPLLIISEILVCAPVGLQ  
NLHNQSNYCTFCRKCLQIVWGLIAYVAVAHGSYNEYFFLSAYLPTQELPFYLSEFAFYLL  
HVLLIMLASYFGRKTFTFSLTFILDFDSKLLKHKIRMHYIDLKFLRNHLSLNF AFFLS  
AVMLGFIQRRSLLGILTVNTSYTLPNVITQTSLIQYYALVYVVKRMQLLHQLIEQTFQ  
QSLKGNIFNVQQLRVLRGLYADMDAYTKHLNDAFAVPLLLFFMASLKSLSFYIFTLYKW  
IDQWTDLSYTVISYAIIEICWQFSRAFLILHFNQAIQNQRKQAAILFTSFSSVAERLEPT  
IVLIISDQPFYCAIVYGSSELYLWNHTVKYACSDDGKRYILGKETMVCVVLQFQNNFPF  
TDVLSSLSIIHIFGAIRYHLRSFNECRSKT

>GmmGR12 TMP-Gr2 scf-650947 5268:6453 MW: 44579.047  
MFEKKRKNKNFFSKATNNKILDFSKKPNQKRTNSLESKFYKALAPLLMISIILSCAPIGL  
QKSIKRINHYYVYQKFLQILWGLTVYISIVLGAYHEYFLWTGVLPVVQLPFYLSEIVLYL  
LHVLQIMIVSYFGRNIFIYLLLESIVDFDDKLLKQLKIHLHYNDLRKFLRNHLLLNFAFFLC  
ATTLGYIQRSTTFLGFLSINSSYTLPNVIIQTSLIQYYAMTYVINKRTQLLYQLIDQVLK  
QSPTKNVFNVQQKLRFLRRLYSDMDEYTKRLNETFSISILLYFMSSVNGISFYIFCVYKY  
AIEWAETEFIWMAYAIVEICVQFARVFLLLHYNQGVQNKQRATVLFTSFRHNNERLEPT  
VSTFQFFSFANIFLN

>GmmGR13 TMP-Gr1 scf-640662 25103:26585 MW: 53170.637  
MIKLVKIYFNINRAVGLFNLHYDQKKGQFISHHKPTILYCALVDTAILTLLPFITIAFLK  
SNYYCESIKSIMINTSLLIITDHTTIIVIMLTWWKRQAICRWCNAFAKMLKAYLGVSDT  
YEYYDIVQRTRKQLLQKLGSSFTIVLLYIYLYGTGKGNFCPTTNDISYVLKTLFCGLTE  
LIIVLIDYNLFLGLTLMHMILQILSKKLEISHDIQLMQRMQEIRYEMRESSKTFNPHMW  
LKQLQGDVDAVAESAALKKMIYELVRILQVPYLCLLNAFQSLTAIMFHILRFTQQRHL  
DIITVIFYLIVLSANITNLMKSFQVCEYLCEDFKIFNEKVYALILNDNLRQAVNDNGADN  
SLVLSRFLFLENSDNDNRKKDEIWFSFLTKEYEKNGNLSHIPINTILQVKLIVLETFSGK  
VRNIIAIDHVKNELSTCVCMQDET MNDEFTKAKDMKI

>GmmGR14 TMP-Gr6 scf-652170 14938990:14942365 MW: 35515.863  
MSTKFQRLRQHFISHQVFEALQPLFFITFLYGLTPFRVTTNKGGEKSIKMSAFGFINIAL  
YILLYGSCYIISLLREESVAGYFFRNKISDVGNMTCNGLITGTVIYISAVTQRSKMLR  
VIATLHNLDKNFANIGIKVKYSRIYRFSIVMLTFKSLVIGVYFVGVYRLLMSMNITPAFT  
VCVTFFLQHSVLFLAICLFCFVARSFERRLVILNKV SIGELVLCIVAELIDVLIPRLFST  
MPTDTWPIREMLPSFPELITVCFSHFRRRASSEDNVLMTYIKPLQSMSFVQFFESNNLSS  
FPLKINLKL
