# Supplementary material for: Odorant and Gustatory Receptors in the Tsetse Fly Glossina morsitans morsitans
Source: PubMed Central journal article supplement (PMC3998910; doi:10.1371/journal.pntd.0002663), 2014-04-24
Supplement: pntd.0002663.s003.pdf [file pntd.0002663.s003.pdf]

**Table S1. The genomic annotation of *Glossina morsitans morsitans* OR and GR genes.**

| <i>G. m. morsitans</i> | Scaffold         | Gene region            | Reciprocal BlastP search |           |                                                                             |
|------------------------|------------------|------------------------|--------------------------|-----------|-----------------------------------------------------------------------------|
|                        |                  |                        | NCBI acc. no.            | E-value   | Description                                                                 |
| GmmOr1                 | scf7180000648683 | 14760..27560 (-)       | AFH96943.1               | 0.00E+000 | odorant receptor co-receptor [ <i>Chrysomya rufifacies</i> ]                |
| GmmOr2                 | scf7180000648756 | 29714..32260 (-)       | NP_525046.1              | 5.00E-126 | odorant receptor 2a [ <i>Drosophila melanogaster</i> ] >sp O46077.2         |
| GmmOr3                 | scf7180000648228 | 109437..110684 (-)     | XP_002100282.1           | 1.80E-088 | GE16253 [ <i>Drosophila yakuba</i> ] >gb EDX01390.1                         |
| GmmOr4                 | scf7180000642438 | 111181..112437 (+)     | XP_002088410.1           | 7.20E-080 | GE18551 [ <i>Drosophila yakuba</i> ] >gb EDW88122.1                         |
| GmmOr5a                | scf7180000639717 | 1658..7954 (-)         | XP_004530390.1           | 5.30E-070 | PREDICTED: odorant receptor 33b-like [ <i>Ceratitis capitata</i> ]          |
| GmmOr6                 | scf7180000651846 | 662439..668878 (-)     | XP_002080251.1           | 5.00E-073 | GD10347 [ <i>Drosophila simulans</i> ] >gb EDX05836.1                       |
| GmmOr7                 | scf7180000651846 | 655700..658243 (-)     | XP_002080251.1           | 2.40E-078 | GD10347 [ <i>Drosophila simulans</i> ] >gb EDX05836.1                       |
| GmmOr8                 | scf7180000651846 | 659294..662305 (-)     | XP_001961367.1           | 3.50E-076 | GF13833 [ <i>Drosophila ananassae</i> ] >gb EDV38189.1                      |
| GmmOr9                 | scf7180000652157 | 136730..138889 (-)     | XP_002080251.1           | 1.90E-096 | GD10347 [ <i>Drosophila simulans</i> ] >gb EDX05836.1                       |
| GmmOr10                | scf7180000644232 | 131824..133273 (+)     | XP_004526336.1           | 6.60E-104 | PREDICTED: odorant receptor 46a, A-like [ <i>Ceratitis capitata</i> ]       |
| GmmOr11                | scf7180000652156 | 1267206..1269387 (-)   | XP_004526336.1           | 2.20E-074 | PREDICTED: odorant receptor 46a, A-like [ <i>Ceratitis capitata</i> ]       |
| GmmOr12                | scf7180000651831 | 454103..455258 (-)     | XP_002098364.1           | 9.00E-087 | GE10342 [ <i>Drosophila yakuba</i> ] >gb EDW98076.1                         |
| GmmOr13                | scf7180000645812 | 24048..26362 (-)       | XP_002019305.1           | 8.00E-117 | GL12310 [ <i>Drosophila persimilis</i> ] >gb EDW37939.1                     |
| GmmOr14                | scf7180000641298 | 67504..69789 (+)       | XP_004534467.1           | 3.00E-043 | PREDICTED: putative odorant receptor 45a-like [ <i>Ceratitis capitata</i> ] |
| GmmOr15                | scf7180000651027 | 85495..88783 (+)       | XP_001361066.3           | 1.30E-040 | Or45a [ <i>Drosophila p. pseudoobscura</i> ] >gb EAL25642.3                 |
| GmmOr16                | scf7180000649095 | 5203..6553 (-)         | XP_004534466.1           | 2.20E-054 | PREDICTED: putative odorant receptor 45a-like [ <i>Ceratitis capitata</i> ] |
| GmmOr17                | scf7180000648564 | 107291..115929 (+)     | XP_002135335.1           | 2.10E-044 | odorant receptor N [ <i>Drosophila p. pseudoobscura</i> ] >gb EDY73962.1    |
| GmmOr18                | scf7180000648792 | 266134..274630 (+)     | ACO83222.1               | 1.00E-106 | putative odorant receptor [ <i>Stomoxys calcitrans</i> ]                    |
| GmmOr19                | scf7180000648792 | 277481..283655 (+)     | ACO83222.1               | 0.00E+000 | putative odorant receptor [ <i>Stomoxys calcitrans</i> ]                    |
| GmmOr20                | scf7180000652157 | 706731..709253 (-)     | XP_004518350.1           | 9.90E-008 | PREDICTED: putative odorant receptor 85d-like [ <i>Ceratitis capitata</i> ] |
| GmmOr21                | scf7180000652170 | 3479799..3481562 (-)   | XP_001994082.1           | 6.90E-037 | GH22929 [ <i>Drosophila grimshawi</i> ] >gb EDV94818.1                      |
| GmmOr22                | scf7180000641538 | 58384..59452 (+)       | AAD26356.1               | 4.80E-012 | odorant receptor DOR62 [ <i>Drosophila melanogaster</i> ]                   |
| GmmOr23                | scf7180000652170 | 25006662..25007967 (+) | XP_002036307.1           | 5.00E-067 | GM17404 [ <i>Drosophila sechellia</i> ] >gb EDW52230.1                      |
| GmmOr24                | scf7180000652157 | 888049..890329 (-)     | XP_001359521.1           | 3.10E-040 | Or85b [ <i>Drosophila p. pseudoobscura</i> ] >gb EAL28667.1                 |
| GmmOr25                | scf7180000649009 | 35111..37791 (+)       | XP_002047978.1           | 2.50E-038 | GJ11611 [ <i>Drosophila virilis</i> ] >gb EDW70320.1                        |
| GmmOr26                | scf7180000652170 | 7565092..7567386 (+)   | XP_004535567.1           | 1.00E-061 | PREDICTED: putative odorant receptor 67c-like [ <i>Ceratitis capitata</i> ] |
| GmmOr27                | scf7180000650866 | 8500..9930 (-)         | XP_004535566.1           | 7.20E-063 | PREDICTED: unknown protein LOC101461468 [ <i>Ceratitis capitata</i> ]       |
| GmmOr28                | scf7180000650866 | 2343..4333 (-)         | XP_004535567.1           | 6.10E-014 | PREDICTED: putative odorant receptor 67c-like [ <i>Ceratitis capitata</i> ] |
| GmmOr29                | scf7180000652141 | 245471..248227 (-)     | XP_004535567.1           | 5.70E-037 | PREDICTED: putative odorant receptor 67c-like [ <i>Ceratitis capitata</i> ] |
| GmmOr30                | scf7180000652141 | 215509..218352 (-)     | XP_321153.1              | 1.40E-115 | AGAP001912-PA [ <i>Anopheles gambiae</i> str. PEST] >gb EAA01023.2          |
| GmmOr31                | scf7180000650238 | 26161..28277 (-)       | NP_523470.3              | 1.00E-039 | odorant receptor 24a [ <i>Drosophila melanogaster</i> ] >sp P81913.4        |
| GmmOr32                | scf7180000648410 | 219323..223133 (-)     | XP_002075406.1           | 2.60E-073 | GK17746 [ <i>Drosophila willistoni</i> ] >gb EDW86392.1                     |

|         |                  |                        |                |           |                                                                    |
|---------|------------------|------------------------|----------------|-----------|--------------------------------------------------------------------|
| GmmOr33 | scf7180000648614 | 40250..49045 (+)       | NP_523721.1    | 3.00E-067 | odorant receptor 49b [Drosophila melanogaster] >sp Q9V6H2.1        |
| GmmOr34 | scf7180000652170 | 23283182..23286806 (+) | CBA13932.1     | 5.50E-022 | odorant receptor 85d [Drosophila melanogaster]                     |
| GmmOr35 | scf7180000648722 | 141942..145983 (-)     | ADK48351.1     | 1.30E-067 | odorant receptor 43a [Drosophila melanogaster]                     |
| GmmOr36 | scf7180000648722 | 191876..198790 (-)     | XP_004534194.1 | 1.10E-039 | PREDICTED: putative odorant receptor 30a-like [Ceratitis capitata] |
| GmmOr37 | scf7180000648373 | 4213..5709 (-)         | XP_004531513.1 | 1.90E-118 | PREDICTED: putative odorant receptor 74a-like [Ceratitis capitata] |
| GmmOr38 | scf7180000648495 | 88188..91340 (+)       | XP_004522725.1 | 7.70E-097 | PREDICTED: odorant receptor 47b-like [Ceratitis capitata]          |
| GmmOr39 | scf7180000648080 | 333109..334447 (+)     | XP_004536014.1 | 5.10E-081 | PREDICTED: putative odorant receptor 88a-like [Ceratitis capitata] |
| GmmOr40 | scf7180000649009 | 40802..42730 (+)       | XP_002049113.1 | 1.20E-075 | GJ21406 [Drosophila virilis] >gb EDW60306.1                        |
| GmmOr41 | scf7180000649048 | 4425..5787 (-)         | XP_002094291.1 | 1.50E-074 | GE21738 [Drosophila yakuba] >gb EDW94003.1                         |
| GmmOr42 | scf7180000649048 | 15..1464 (-)           | XP_002094291.1 | 1.30E-080 | GE21738 [Drosophila yakuba] >gb EDW94003.1                         |
| GmmOr43 | scf7180000651490 | 579..1910 (+)          | XP_002094291.1 | 9.00E-058 | GE21738 [Drosophila yakuba] >gb EDW94003.1                         |
| GmmOr44 | scf7180000648928 | 37939..39536 (-)       | XP_002069080.1 | 5.40E-095 | GK24034 [Drosophila willistoni] >gb EDW80066.1                     |
| GmmOr45 | scf7180000650705 | 207676..209075 (+)     | ADG96063.1     | 3.00E-089 | putative odorant receptor [Stomoxys calcitrans]                    |
| GmmOr46 | scf7180000645804 | 155235..156578 (-)     | XP_002047834.1 | 1.30E-084 | GJ13657 [Drosophila virilis] >gb EDW70176.1                        |
| GmmGR1  | scf7180000650411 | 214655..216066 (+)     | AFH96947.1     | 6.00E-092 | gustatory receptor 1 [Chrysomya megacephala]                       |
| GmmGR2  | scf7180000652170 | 18996209..18997720     | XP_312786.1    | 4.00E-039 | AGAP003098-PA [Anopheles gambiae str. PEST] >gb EAA08342.2         |
| GmmGR3  | scf7180000652170 | 18992721..18996270     | XP_312786.1    | 2.00E-059 | AGAP003098-PA [Anopheles gambiae str. PEST] >gb EAA08342.2         |
| GmmGR4  | scf7180000650833 | 228463..237409 (-)     | AFH96945.1     | 2.00E-087 | gustatory receptor 2 [Chrysomya megacephala]                       |
| GmmGR5  | scf7180000647997 | 53981..55829 (+)       | XP_001354191.2 | 3.00E-045 | Gr66a [Drosophila p. pseudoobscura] >gb EAL31243.2                 |
| GmmGR6  | scf7180000652170 | 14942509..14944789     | NP_995642.1    | 7.00E-058 | gustatory receptor 28b, isoform C [Drosophila melanogaster]        |
| GmmGR7  | scf7180000648889 | 6876..8857 (+)         | NP_995642.1    | 7.00E-038 | gustatory receptor 28b, C-like [Drosophila melanogaster]           |
| GmmGR8  | scf7180000651593 | 207733..209113 (+)     | XP_001968324.1 | 2.00E-027 | GG24573 [Drosophila erecta] >gb EDV57383.1                         |
| GmmGR9  | scf7180000652170 | 23328288..23329768     | XP_002021945.1 | 5.00E-046 | GL14254 [Drosophila persimilis] >gb EDW25886.1                     |
| GmmGR10 | scf7180000645661 | 235649..237209 (+)     | XP_001962923.1 | 1.00E-032 | GF14188 [Drosophila ananassae] >gb EDV32144.1                      |
| GmmGR11 | scf7180000652146 | 594756..597494 (-)     | XP_309027.2    | 8.00E-024 | AGAP006716-PA [Anopheles gambiae str. PEST] >gb EAA45495.2         |
| GmmGR12 | scf7180000650947 | 5268..6453 (+)         | XP_002087574.1 | 6.00E-022 | GE17747 [Drosophila yakuba] >gb EDW87286.1                         |
| GmmGR13 | scf7180000640662 | 25103..26585 (+)       | XP_309026.1    | 9.00E-024 | AGAP006717-PA [Anopheles gambiae str. PEST] >gb EAA45494.1         |
| GmmGR14 | scf7180000652170 | 14938990..14942365     | XP_002018685.1 | 3.00E-015 | Gr28b [Drosophila p. pseudoobscura] >gb EDW36881.1                 |

The *Glossina morsitans morsitans* annotated gene loci names, scaffold identity, gene location within the scaffold, in bracket (\*) refers to the coding strand where (-), reverse and (+), forward strands; columns under reiterative blast searches gives best Diptera query orthologs for *Drosophila*, *Anopheles* and *Aedes* and their e-values
