# Supplementary material for: Odorant and Gustatory Receptors in the Tsetse Fly Glossina morsitans morsitans
Source: PubMed Central journal article supplement (PMC3998910; doi:10.1371/journal.pntd.0002663), 2014-04-24
Supplement: pntd.0002663.s004.pdf [file pntd.0002663.s004.pdf]

**Table S2: List of *Glossina m. morsitans* gene names and their associated identities**

| <b>Names</b> | <b>Vectorbase IDs</b> | <b>Annotation IDs</b> | <b>PhylomeDB IDs</b> |
|--------------|-----------------------|-----------------------|----------------------|
| GmmOR1       | GMOY005610            | TMP007718             | Phy004DJN0           |
| GmmOR2       | GMOY005796            | TMP007907             | Phy004DLA7           |
| GmmOR3       | GMOY004772            | TMP006862             | Phy004DLVK           |
| GmmOR4       | TMP_OR4               | new                   | NI                   |
| GmmOR5       | GMOY012018            | TMP002414             | Phy004DJ9V           |
| GmmOR6       | GMOY009475            | TMP011670             | Phy004DNDR           |
| GmmOR7       | TMP_OR7               | new                   | NI                   |
| GmmOR8       | TMP_OR8               | new                   | NI                   |
| GmmOR9       | TMP_OR9               | new                   | NI                   |
| GmmOR10      | TMP_OR10              | new                   | NI                   |
| GmmOR11      | GMOY010761            | TMP012981             | Phy004DNR0           |
| GmmOR12      | GMOY009271            | TMP011461             | Phy004DJ4E           |
| GmmOR13      | GMOY003312            | TMP005369             | Phy004DJWZ           |
| GmmOR14      | GMOY001365            | TMP003388             | Phy004DHFZ           |
| GmmOR15      | TMP_OR15              | new                   | NI                   |
| GmmOR16      | TMP_OR16              | new                   | NI                   |
| GmmOR17      | GMOY005386            | TMP007492             | Phy004DING           |
| GmmOR18      | TMP_OR18              | new                   | NI                   |
| GmmOR19      | GMOY012322            | TMP008029             | Phy004DFIF           |
| GmmOR20      | TMP_OR20              | new                   | NI                   |
| GmmOR21      | GMOY011399            | TMP013635             | Phy004DG76           |
| GmmOR22      | TMP_OR22              | new                   | NI                   |
| GmmOR23      | TMP_OR23              | new                   | NI                   |
| GmmOR24      | GMOY010839            | TMP013060             | Phy004DLG6           |
| GmmOR25      | GMOY012357            | TMP008534             | Phy004DL0Y           |
| GmmOR26      | TMP_OR26              | new                   | NI                   |
| GmmOR27      | GMOY008038            | TMP010200             | Phy004DHF8           |
| GmmOR28      | TMP_OR28              | new                   | NI                   |
| GmmOR29      | TMP_OR29              | new                   | NI                   |
| GmmOR30      | TMP_OR30              | new                   | NI                   |
| GmmOR31      | TMP_OR31              | new                   | NI                   |
| GmmOR32      | GMOY005084            | TMP007180             | Phy004DLCW           |
| GmmOR33      | GMOY005479            | TMP007587             | Phy004DLQX           |
| GmmOR34      | GMOY011902            | TMP014141             | NI                   |
| GmmOR35      | TMP_OR                | new                   | NI                   |
| GmmOR36      | TMP_OR36              | new                   | NI                   |
| GmmOR37      | TMP_OR37              | new                   | NI                   |
| GmmOR38      | TMP_OR38              | new                   | NI                   |
| GmmOR39      | GMOY004392            | TMP006475             | Phy004DLNZ           |
| GmmOR40      | GMOY012356            | new                   | NI                   |
| GmmOR41      | GMOY006480            | TMP008603             | Phy004DL5M           |
| GmmOR42      | GMOY006479            | TMP008602             | Phy004DGCY           |

|         |            |           |            |
|---------|------------|-----------|------------|
| GmmOR43 | TMP_OR43   | new       | NI         |
| GmmOR44 | GMOY006265 | TMP008385 | Phy004DKY7 |
| GmmOR45 | GMOY007896 | TMP010054 | Phy004DKY6 |
| GmmOR46 | GMOY003305 | TMP005362 | Phy004DHGB |
| GmmGR1  | GMOY007472 | TMP009619 | Phy004DNCP |
| GmmGR2  | GMOY011510 | TMP013746 | Phy004DKZ0 |
| GmmGR3  | TMP_GR5    | new       | NI         |
| GmmGR4  | GMOY008001 | TMP010160 | Phy004DN6A |
| GmmGR5  | GMOY004207 | TMP006286 | Phy004DF12 |
| GmmGR6  | GMOY011615 | TMP013853 | Phy004DG8D |
| GmmGR7  | GMOY006209 | TMP008329 | Phy004DL2A |
| GmmGR8  | TMP_GR4    | new       | NI         |
| GmmGR9  | GMOY011903 | TMP014142 | Phy004DMN8 |
| GmmGR10 | GMOY003231 | TMP005286 | Phy004DFZC |
| GmmGR11 | TMP_GR3    | new       | NI         |
| GmmGR12 | TMP_GR2    | new       | NI         |
| GmmGR13 | TMP_GR1    | new       | NI         |
| GmmGR14 | TMP_GR6    | new       | NI         |

---

Vectorbase identities prefixed 'TMP\_' are newly created during annotation and are yet to be integrated into both vectorbase and phylomedb; NI – not integrated

---
